# Supplementary material
Source: publisher site journal article supplement (https://cdn.jamanetwork.com/ama/content_public/journal/jama/0/joi200030supp1_prod.pdf)
Supplement: Supplementary file 1 [file joi200030supp1_prod.pdf]

## Supplementary Online Content

Young BE, Ong SWX, Kalimuddin S, et al; for the Singapore 2019 Novel Coronavirus Outbreak Research Team. Epidemiologic features and clinical course of patients infected with SARS-CoV-2 in Singapore. *JAMA*. doi:10.1001/jama.2020.3204

**eMethods.** Diagnostic Testing and RNA-Dependent RNA Polymerase (*RdRp*) Sequencing of Severe Acute Respiratory Syndrome Coronavirus 2 (SARS-CoV-2) From Nasopharyngeal Samples

**eFigure 1.** Case Map of Confirmed 2019-nCoV Cases in Singapore

**eFigure 2.** Workflow of Screening and Admission for Suspected COVID-19 (as of February 8, 2020).

**eFigure 3A.** Individual Plot of Serial Cycle Threshold (Ct) Values by Day of Illness for Each Patient

**eFigure 3B.** Serial Cycle Threshold Values for All Patients by Day of Illness

**eFigure 4.** Serial Cycle Threshold (Ct) Values by Day of Illness up to Day 14, Split by Patients Who (A) Required Supplemental Oxygen and (B) Did Not Require Supplemental Oxygen

**eFigure 5.** Phylogenetic Tree of Six Patients With Available Sequences

**eTable 1.** Epidemiologic Features of Patients Infected With 2019-nCoV

**eTable 2.** Cycle Threshold Values for Respiratory, Blood, Urine, and Stool Samples by Day of Illness

**eTable 3.** Singapore 2019 Novel Coronavirus Outbreak Research Team Members

### eReferences

This supplementary material has been provided by the authors to give readers additional information about their work.

## eMethods

### **Diagnostic testing and RNA-dependent RNA polymerase (RdRp) sequencing of Severe Acute Respiratory Syndrome coronavirus 2 (SARS-CoV-2) from nasopharyngeal samples**

Extraction of viral nucleic acid from respiratory specimens was performed using EZ1 virus mini kit v2.0 (Qiagen) according to the manufacturer's instruction. The RNA was eluted in 60µl of AVE buffer and used as template for all assays.

Three specific real-time RT-PCR methods targeting the N, S, and ORF1ab genes were designed to detect the presence of SARS-CoV-2 in clinical samples. The N gene real-time PCR was modified from and shares the same probe as the SARS-CoV N gene RT-PCR. Changes were made in the forward primer to increase sensitivity towards SARS-CoV-2, and in the reverse primer to differentiate between SARS-CoV-2 and SARS-CoV. The modified primer sequences are: forward primer 5' CTC AGT CCA AGA TGG TAT TTC T; reverse primer 5' AGC ACC ATA GGG AAG TCC. The probe sequence is: 5' FAM-ACC TAG GAA CTG GCC CAG AAG CT-BHQ1, as previously described. Thermal cycling was performed at 50°C for 20 minutes for reverse transcription, 95°C for 15 minutes, 50 cycles of 94°C for 5 seconds, then 55°C for 1 minute.

The sequences for the ORF1ab real-time RT-PCR are: forward primer 5' TCA TTG TTA ATG CCT ATA TTA ACC; reverse primer: 5' CAC TTA ATG TAA GGC TTT GTT AAG; probe: 5' FAM- AAC TGC AGA GTC ACA TGT TGA CA-BHQ1. The sequences for the S gene real-time RT-PCR are: forward primer 5' TATACATGTCTCTGGGACCA; reverse primer 5' ATCCAGCCTCTTATTATGTTAGAC; probe 5' FAM-CTAAGAGGTTTGATAACCCTGTCCTACC-BHQ1. Thermal cycling for both ORF1ab and S gene real-time RT-PCR assays were performed at 50°C for 20 minutes for reverse transcription, 95°C for 15 minutes, 50 cycles of 94°C for 5 seconds, 50°C for 20 seconds, and 72°C for 20 seconds.

For all assays, a 20µl reaction containing 5µl RNA template, 500nm each of forward and reverse primer, 150nm probe and 0.2µl QuantiTect RT mix was prepared using QuantiTect Probe RT-PCR kit (Qiagen). All reactions were run on LightCycler 2.0 instrument (Roche). All samples were also tested for endogenous RNase P as an internal control.

One step RT-PCR for coronaviruses was performed using primers modified from a pan-human coronavirus sequencing assay (forward primer 5' GGTTGGGACTATCCTAARTGTGA; reverse primer 5' GGCATCATCAGATAGAATCATCAT)<sup>1</sup>. This primer set was used to amplify a 440bp region using Superscript

III/ Platinum Taq kit (Invitrogen) in a 25µl reaction containing 5µl template RNA and 200nM of each primer. Reverse transcription was performed at 45°C for 10 minutes, 55°C for 10 minutes, followed by Taq activation at 94°C for 2 minutes. Target amplification was performed in 55 cycles of 94°C for 15 seconds, 48°C for 30 seconds, 68°C for 1 minute, and a final extension at 68°C for 5 minutes. Amplified products were visualized by agarose gel electrophoresis and sequenced using Applied Biosystem 3500xL Genetic Analyzer (Applied Biosystems), using the PCR primers and Bigdye v3.1 (Applied Biosystems).

#### **SARS-CoV-2 PCR from other samples**

World Health Organisation interim guidance (updated 17 January 2020) for laboratory testing for Coronavirus disease (COVID-19) in humans was followed for PCR of stool, urine and blood.<sup>1</sup>

eFigure 1. Case Map of Confirmed 2019-nCoV Cases in Singapore

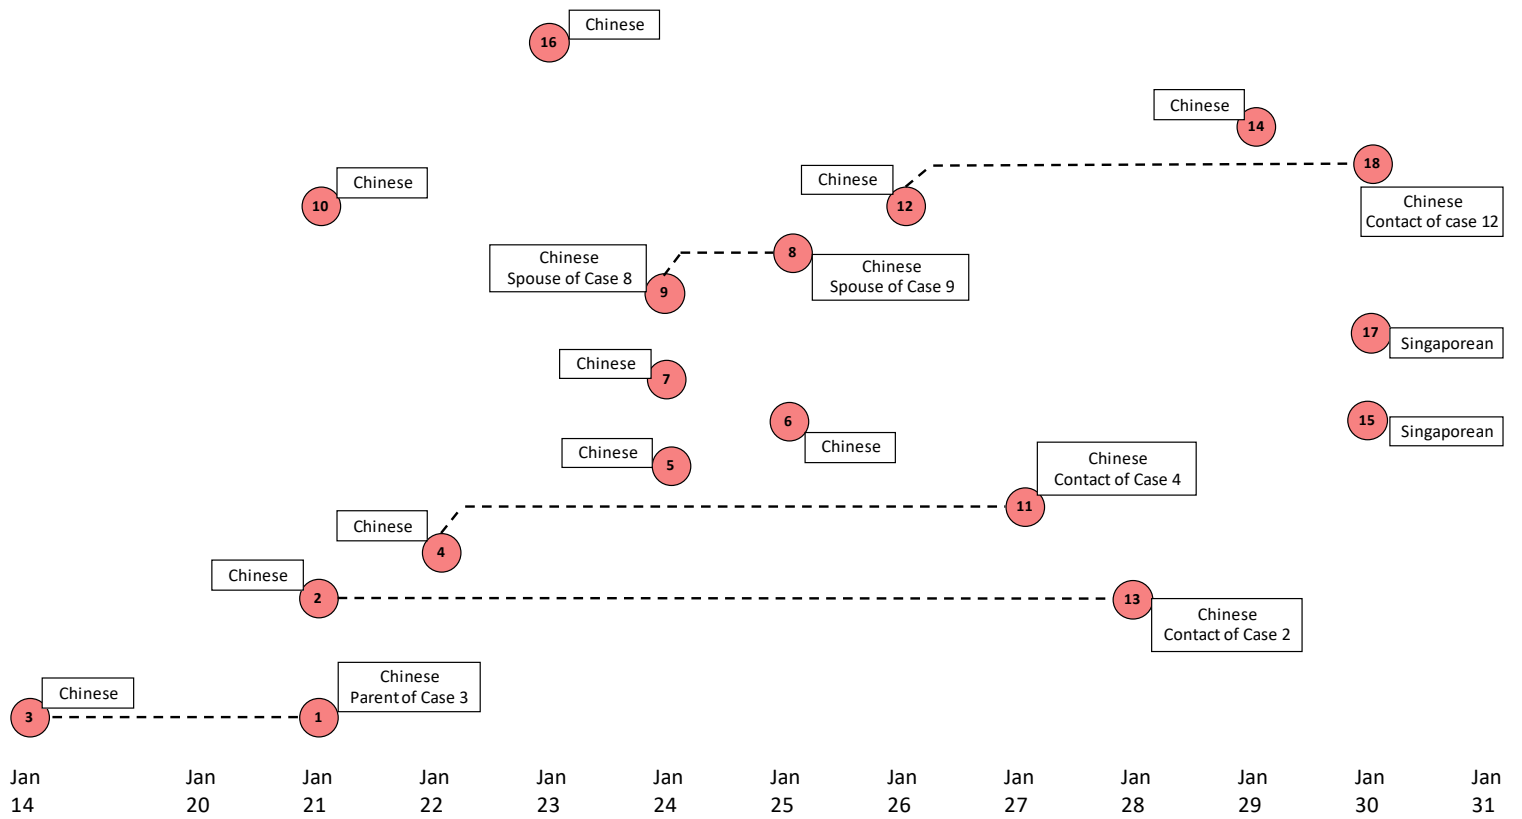

Dotted lines indicate close contact between cases. Dates refer to date of symptom onset.

eFigure 2. Workflow of Screening and Admission for Suspected COVID-19 (as of February 8, 2020)

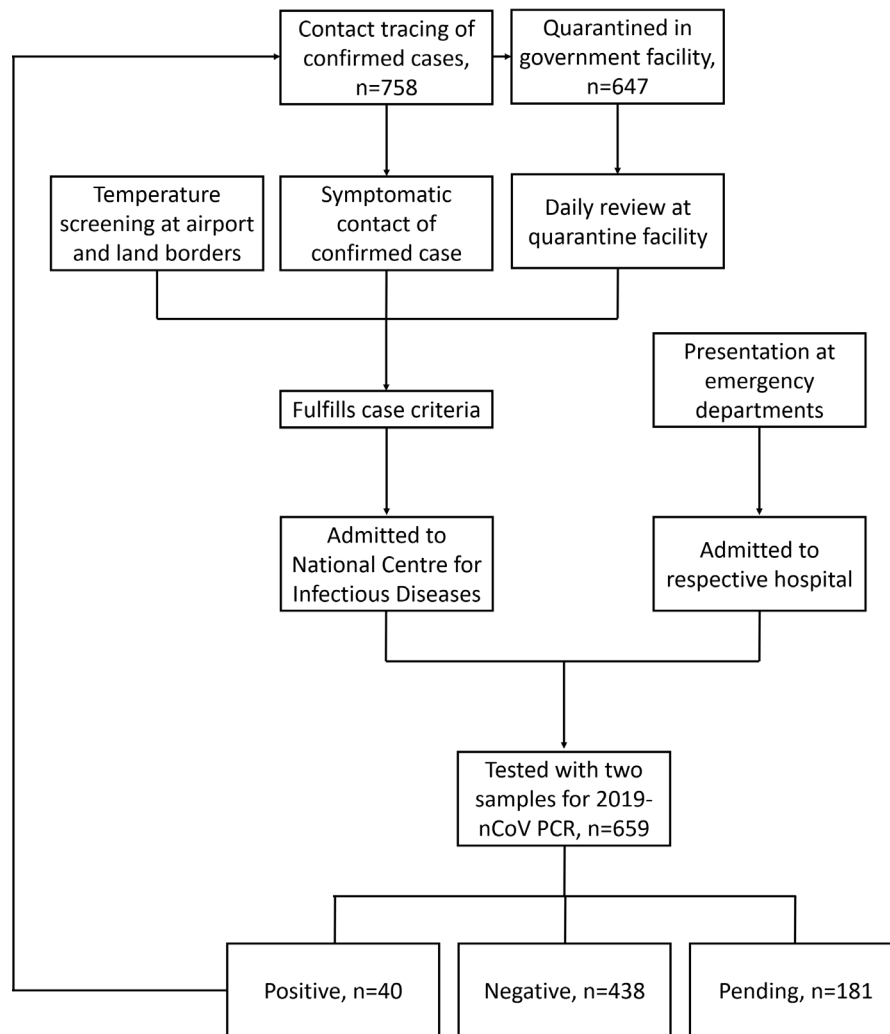

eFigure 3A. Individual Plot of Serial Cycle Threshold (Ct) Values by Day of Illness for Each Patient

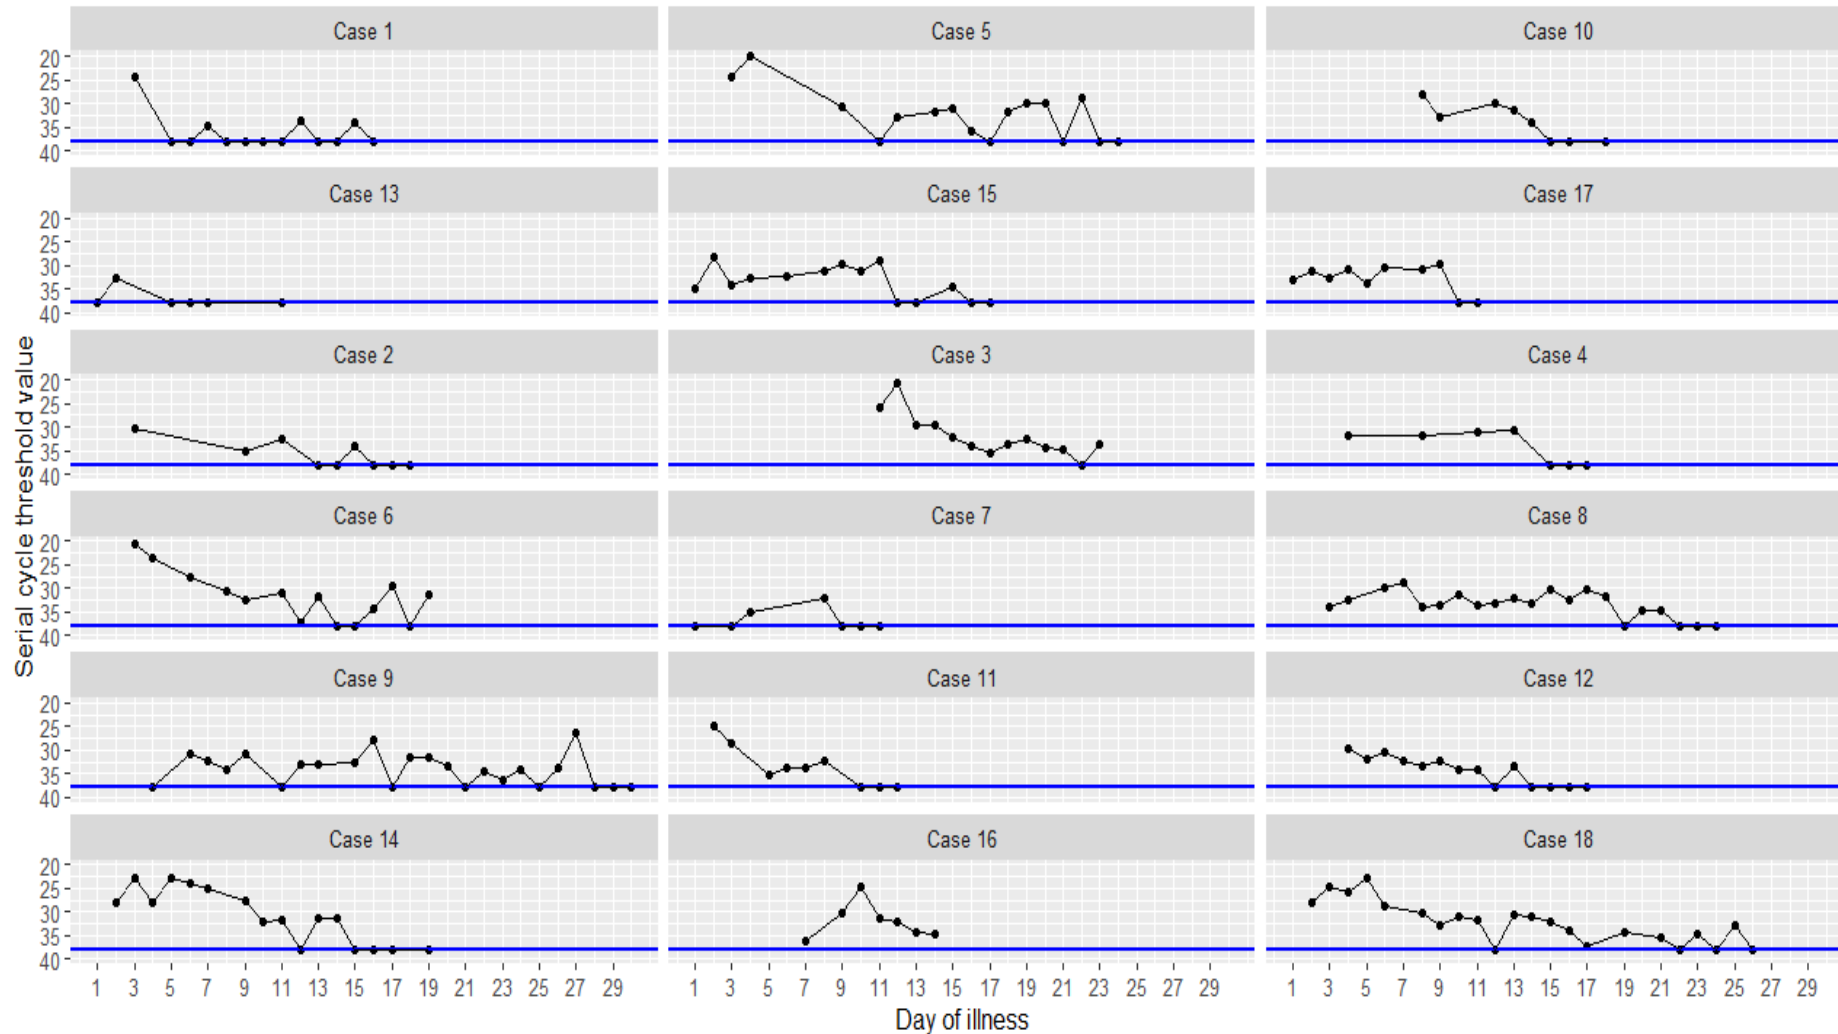

Six patients (Case 1, 5, 10, 13, 15 and 17) required supplemental oxygen, while the other 12 patients did not require supplemental oxygen. Cases 1, 5, 10, 15 and 15 also received lopinavir-ritonavir. Negative PCR results (target not detected) are graphed as a Ct value of 38 for ease of viewing and interpretation (blue horizontal blue line). Cycle Threshold Value corresponds with the number of copies of the virus in a biological sample, in an inversely proportional and exponential manner.

eFigure 3B. Serial Cycle Threshold Values for All Patients by Day of Illness

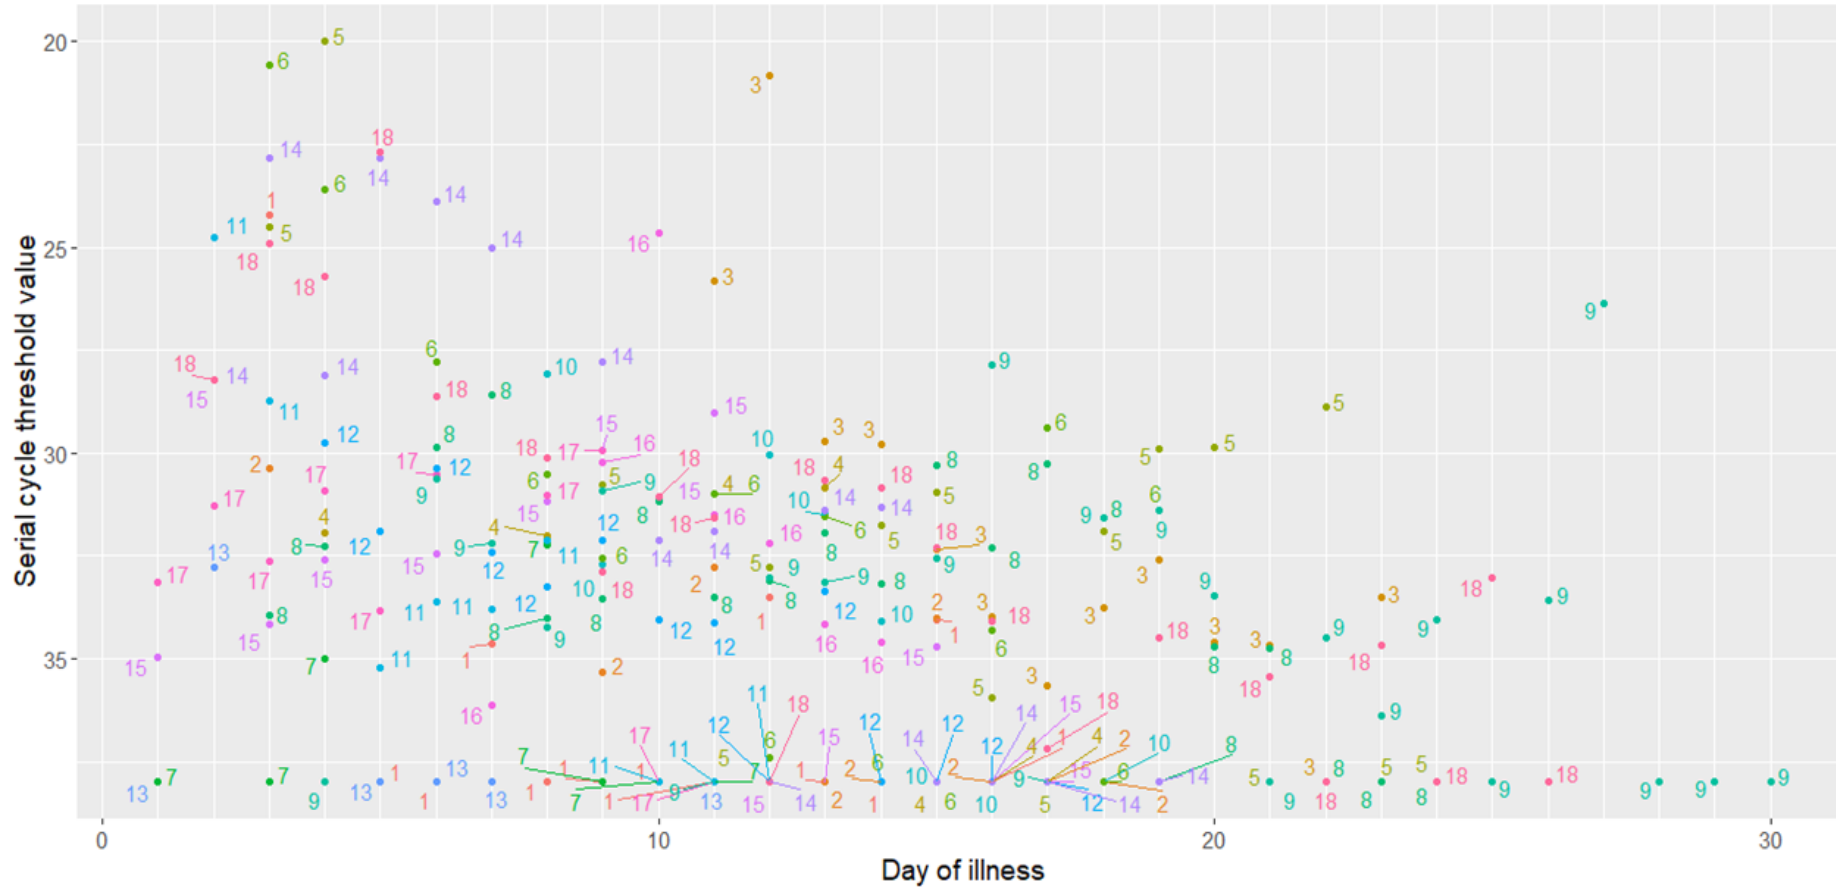

| Day          | 1 | 2 | 3  | 4  | 5 | 6  | 7 | 8  | 9  | 10 | 11 | 12 | 13 | 14 | 15 | 16 | 17 | 18 | 19 | 20 | 21 | 22 | 23 | 24 | 25 | 26 | 27 | 28 | 29 | 30 |
|--------------|---|---|----|----|---|----|---|----|----|----|----|----|----|----|----|----|----|----|----|----|----|----|----|----|----|----|----|----|----|----|
| No. measured | 4 | 6 | 11 | 11 | 7 | 11 | 8 | 12 | 14 | 10 | 17 | 13 | 13 | 11 | 13 | 13 | 11 | 7  | 7  | 4  | 5  | 5  | 5  | 4  | 2  | 2  | 1  | 1  | 1  | 1  |

Negative PCR results (target not detected) are graphed as a Ct value of 38 for ease of viewing and interpretation. Each data point represents the lowest Ct value of that 24-hour period for each patient (case number indicated). Different colors correspond to different patients.

**eFigure 4. Serial Cycle Threshold (Ct) Values by Day of Illness up to Day 14, Split by Patients Who (A) Required Supplemental Oxygen and (B) Did Not Require Supplemental Oxygen**

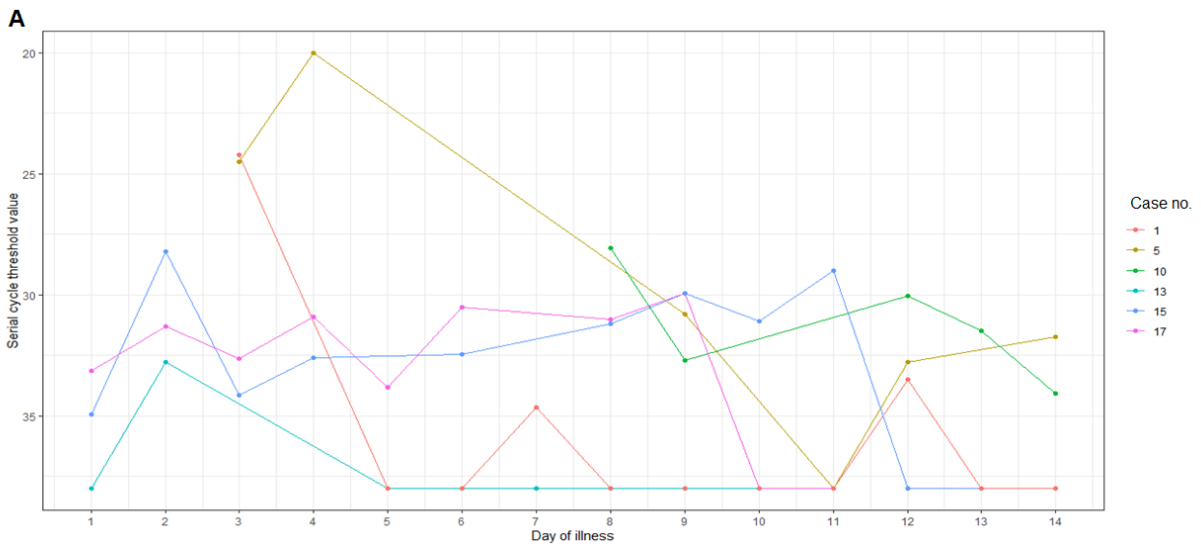

| Day          | 1 | 2 | 3 | 4 | 5 | 6 | 7 | 8 | 9 | 10 | 11 | 12 | 13 | 14 |
|--------------|---|---|---|---|---|---|---|---|---|----|----|----|----|----|
| No. measured | 3 | 3 | 4 | 3 | 3 | 4 | 2 | 4 | 5 | 3  | 5  | 4  | 3  | 3  |

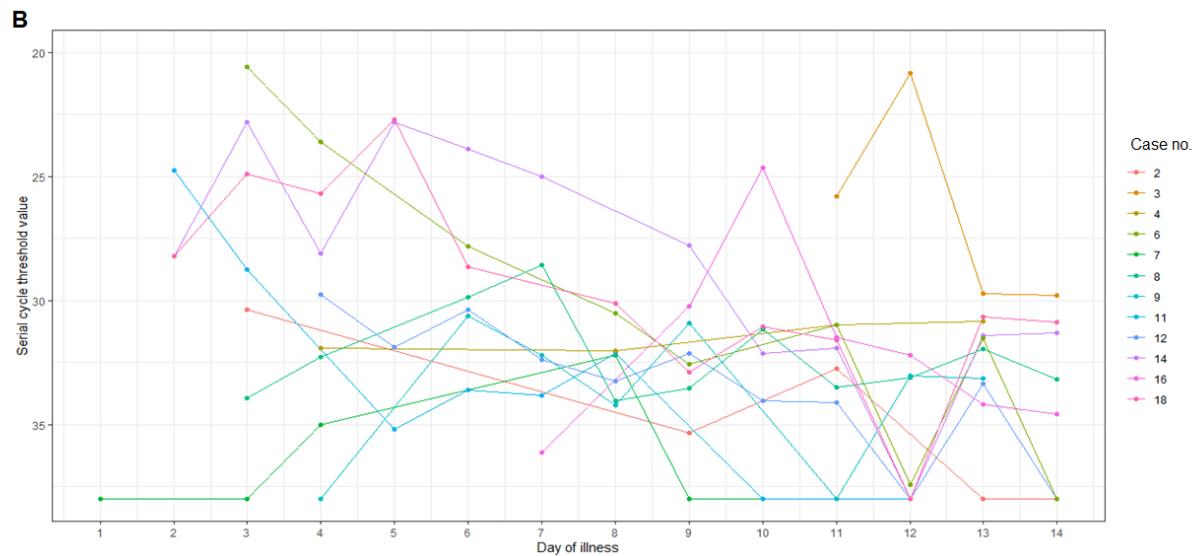

| Day          | 1 | 2 | 3 | 4 | 5 | 6 | 7 | 8 | 9 | 10 | 11 | 12 | 13 | 14 |
|--------------|---|---|---|---|---|---|---|---|---|----|----|----|----|----|
| No. measured | 1 | 3 | 7 | 8 | 4 | 7 | 6 | 8 | 9 | 7  | 12 | 9  | 10 | 8  |

Negative PCR results (target not detected) are graphed as a Ct value of 38 for ease of viewing and interpretation. Each data point represents the lowest Ct value of that 24-hour period for each patient.



**eFigure 5. Phylogenetic Tree of Six Patients With Available Sequences**

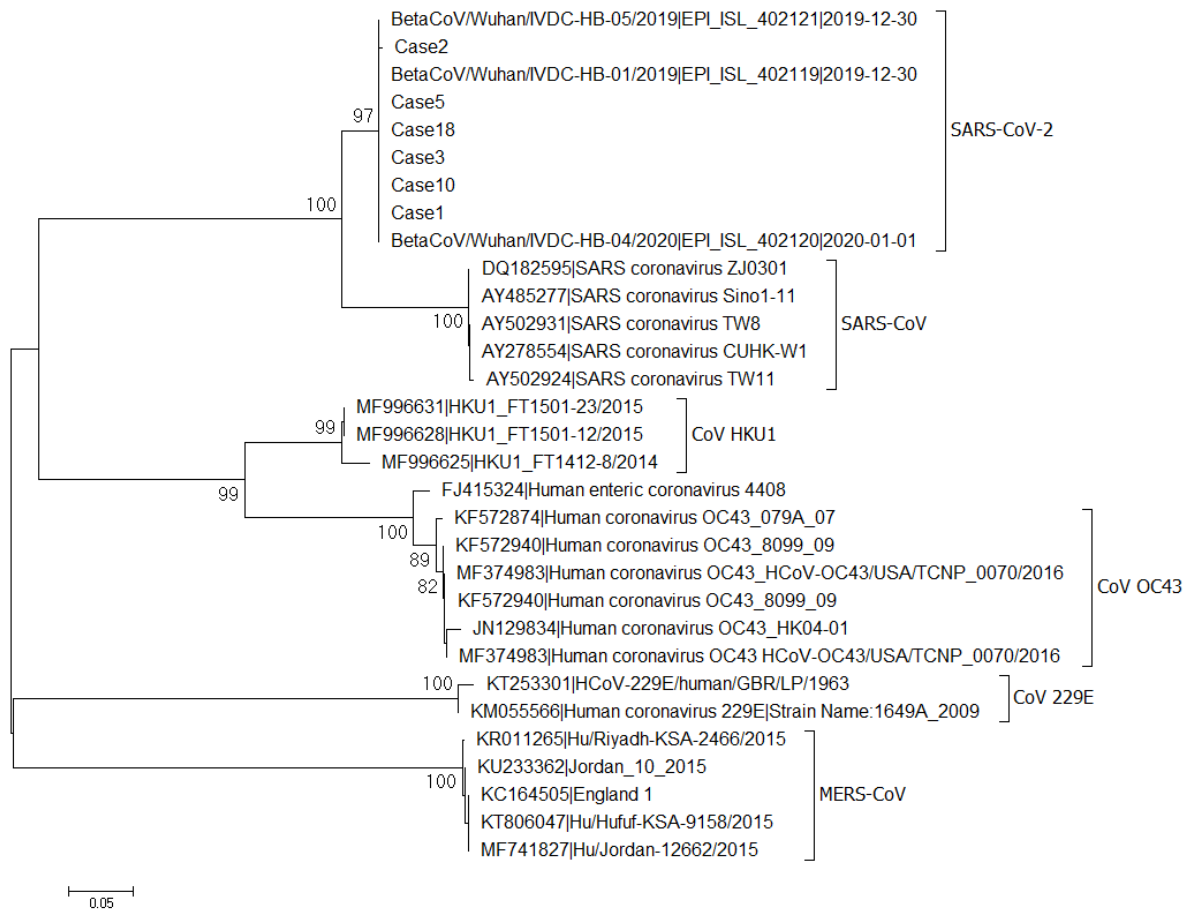

Genetic analysis of partial RdRp gene sequence of SARS-CoV-2 strains from six of the cases.. The phylogenetic tree was inferred by Maximum Likelihood, with 1000 bootstrap validation.<sup>2</sup>

**eTable 1. Epidemiologic Features of Patients Infected With 2019-nCoV**

|                           |                                           | n (%)    |
|---------------------------|-------------------------------------------|----------|
| <b>Exposure history</b>   |                                           |          |
|                           | Travel to Wuhan                           | 18 (100) |
|                           | Contact with Huanan seafood market        | 1 (5.6)  |
|                           | Contact with healthcare facility in China | 3 (17)   |
|                           | Contact with known case of 2019-nCoV      | 10 (56)  |
| <b>Source of referral</b> |                                           |          |
|                           | Self-referral to emergency department     | 10 (56)  |
|                           | Primary healthcare clinic                 | 1 (5.6)  |
|                           | Screening at air or land borders          | 3 (17)   |
|                           | Contact tracing                           | 4 (22)   |

eTable 2. Cycle Threshold Values for Respiratory, Blood, Urine, and Stool Samples by Day of Illness

| Case No. | Sample      | 1  | 2 | 3    | 4    | 5  | 6    | 7    | 8    | 9    | 10 | 11   | 12   | 13   | 14   | 15   | 16   | 17   | 18   | 19   | 20   | 21   | 22   | 23   |  |
|----------|-------------|----|---|------|------|----|------|------|------|------|----|------|------|------|------|------|------|------|------|------|------|------|------|------|--|
| 1        | Respiratory |    |   | 24.2 | -    | ND | ND   | 34.7 | ND   | ND   | ND | ND   | 33.5 | ND   | ND   | 34.1 | ND   | ND   | -    | ND   | ND   | ND   |      |      |  |
|          | Blood       |    |   | -    | -    | -  | -    | -    | -    | -    | -  | -    | -    | -    | -    | -    | -    | -    | -    | -    | -    | -    | -    |      |  |
|          | Urine       |    |   | -    | -    | -  | -    | -    | -    | -    | -  | -    | -    | -    | -    | -    | -    | -    | -    | -    | -    | -    | -    |      |  |
|          | Stool       |    |   | -    | -    | -  | -    | -    | -    | -    | -  | -    | -    | -    | -    | -    | -    | -    | -    | -    | -    | -    | -    |      |  |
| 2        | Respiratory |    |   | 30.4 | -    | -  | -    | -    | -    | 35.3 | -  | 32.8 | -    | ND   | ND   | 34.0 | ND   | ND   |      |      |      |      |      |      |  |
|          | Blood       |    |   | -    | ND   | -  | ND   | -    | ND   | -    | -  | ND   | -    | -    | -    | -    | -    | -    |      |      |      |      |      |      |  |
|          | Urine       |    |   | -    | ND   | -  | -    | -    |      | -    | -  | -    | -    | -    | -    | -    | -    | -    |      |      |      |      |      |      |  |
|          | Stool       |    |   | -    | -    | ND | ND   | -    | ND   | -    | ND | -    | ND   | ND   | -    | -    | -    | -    |      |      |      |      |      |      |  |
| 3        | Respiratory |    |   |      |      |    |      |      |      |      |    | 25.8 | 20.8 | 29.7 | 29.8 | 32.3 | 34.0 | 35.6 | 33.8 | 32.6 | 34.6 | 34.7 | ND   | 33.5 |  |
|          | Blood       |    |   |      |      |    |      |      |      |      |    | -    | -    | -    | -    | -    | -    | -    | -    | -    | -    | -    | -    | -    |  |
|          | Urine       |    |   |      |      |    |      |      |      |      |    | -    | -    | -    | -    | -    | -    | -    | -    | -    | -    | -    | -    | -    |  |
|          | Stool       |    |   |      |      |    |      |      |      |      |    | -    | -    | -    | -    | -    | -    | -    | -    | -    | -    | -    | -    | -    |  |
| 4        | Respiratory |    |   |      | 31.9 | -  | -    | -    | 32.0 | -    | -  | 31.0 | -    | 30.8 | -    | ND   | ND   | ND   |      |      |      |      |      |      |  |
|          | Blood       |    |   |      | -    | -  | -    | -    | -    | -    | -  | -    | -    | -    | -    | -    | -    | -    |      |      |      |      |      |      |  |
|          | Urine       |    |   |      | -    | -  | -    | -    | -    | -    | -  | -    | -    | -    | -    | -    | -    | -    |      |      |      |      |      |      |  |
|          | Stool       |    |   |      | -    | -  | -    | -    | -    | -    | -  | -    | -    | -    | -    | -    | -    | -    |      |      |      |      |      |      |  |
| 5        | Respiratory |    |   | 24.5 | 20.0 | -  | -    | -    | -    | 30.8 | -  | ND   | 32.8 | -    | 31.8 | 31.0 | 36.0 | ND   | 31.9 | 29.9 | 29.9 | ND   | 28.9 |      |  |
|          | Blood       |    |   | -    | -    | -  | -    | -    | -    | -    | -  | -    | -    | 32.7 | 33.6 | -    | -    | -    | -    | -    | -    | -    | -    |      |  |
|          | Urine       |    |   | -    | -    | -  | -    | -    | -    | -    | -  | -    | -    | -    | -    | -    | -    | -    | -    | -    | -    | -    | -    |      |  |
|          | Stool       |    |   | -    | -    | -  | -    | -    | -    | -    | -  | -    | -    | -    | -    | -    | -    | -    | -    | -    | -    | -    | -    |      |  |
| 6        | Respiratory |    |   | 20.6 | 23.6 | -  | 27.8 | -    | 30.5 | 32.6 | -  | 31.0 | 37.4 | 31.5 | ND   | ND   | 34.3 | 29.4 | ND   | 31.4 |      |      |      |      |  |
|          | Blood       |    |   | -    | -    | -  | -    | -    | -    | -    | -  | -    | -    | -    | -    | -    | -    | -    | -    | -    | -    |      |      |      |  |
|          | Urine       |    |   | -    | -    | -  | -    | -    | -    | -    | -  | -    | -    | -    | -    | -    | -    | -    | -    | -    | -    |      |      |      |  |
|          | Stool       |    |   | -    | -    | -  | -    | -    | -    | -    | -  | -    | -    | -    | -    | -    | -    | -    | -    | -    | -    |      |      |      |  |
| 7        | Respiratory | ND | - | ND   | 35.0 | -  | -    | -    | 32.2 | ND   | ND | ND   |      |      |      |      |      |      |      |      |      |      |      |      |  |
|          | Blood       | -  | - | -    | -    | ND | -    | -    | -    | -    | -  | -    |      |      |      |      |      |      |      |      |      |      |      |      |  |
|          | Urine       | -  | - | -    | -    | ND | -    | -    | -    | -    | -  | -    |      |      |      |      |      |      |      |      |      |      |      |      |  |
|          | Stool       | -  | - | -    | -    | -  | -    | -    | -    | -    | -  | -    |      |      |      |      |      |      |      |      |      |      |      |      |  |

|    |             |      |      |      |      |      |      |      |      |      |      |      |      |      |      |      |      |      |      |      |      |      |      |      |
|----|-------------|------|------|------|------|------|------|------|------|------|------|------|------|------|------|------|------|------|------|------|------|------|------|------|
| 8  | Respiratory |      |      | 34.0 | 32.3 | -    | 29.9 | 28.6 | 34.0 | 33.5 | 31.2 | 33.5 | 33.1 | 31.9 | 33.2 | 30.3 | 32.3 | 30.3 | 31.6 | ND   | 34.7 | 34.8 | ND   | ND   |
|    | Blood       |      |      | -    | -    | -    | -    | -    | -    | -    | -    | -    | -    | -    | -    | -    | -    | -    | -    | -    | -    | -    | -    | -    |
|    | Urine       |      |      | -    | -    | -    | -    | -    | -    | -    | -    | -    | -    | -    | -    | -    | -    | -    | -    | -    | -    | -    | -    | -    |
|    | Stool       |      |      | -    | -    | -    | -    | -    | -    | -    | -    | -    | -    | -    | -    | -    | -    | -    | -    | -    | -    | -    | -    | -    |
| 9  | Respiratory |      |      |      | ND   | -    | 30.6 | 32.2 | 34.2 | 30.9 | -    | ND   | 33.0 | 33.2 | -    | 32.6 | 27.9 | ND   | 31.6 | 31.4 | 33.5 | ND   | 34.5 | 36.4 |
|    | Blood       |      |      |      | -    | -    | -    | ND   | -    | ND   | -    | -    | -    | -    | -    | -    | -    | -    | -    | -    | -    | -    | -    | -    |
|    | Urine       |      |      |      | -    | -    | -    | ND   | -    | -    | -    | -    | -    | -    | -    | -    | -    | -    | -    | -    | -    | -    | -    | -    |
|    | Stool       |      |      |      | -    | -    | -    | -    | ND   | ND   | -    | ND   | -    | ND   | -    | ND   | -    | -    | -    | -    | -    | -    | -    | -    |
| 10 | Respiratory |      |      |      |      |      |      |      | 28.1 | 32.7 | -    | -    | 30.0 | 31.5 | 34.1 | -    | ND   | -    | ND   |      |      |      |      |      |
|    | Blood       |      |      |      |      |      |      |      | -    | -    | ND   | -    | -    | -    | -    | -    | -    | -    | -    |      |      |      |      |      |
|    | Urine       |      |      |      |      |      |      |      | -    | -    | ND   | -    | -    | -    | -    | -    | -    | -    | -    |      |      |      |      |      |
|    | Stool       |      |      |      |      |      |      |      | -    | -    | -    | ND   | -    | ND   | -    | -    | -    | -    | -    |      |      |      |      |      |
| 11 | Respiratory |      | 24.8 | 28.7 | -    | 35.2 | 33.6 | 33.8 | 32.1 | -    | ND   | ND   | ND   |      |      |      |      |      |      |      |      |      |      |      |
|    | Blood       |      | -    | -    | ND   | -    | ND   | -    | -    | -    | -    | -    | -    |      |      |      |      |      |      |      |      |      |      |      |
|    | Urine       |      | -    | -    | -    | -    | -    | -    | -    | -    | -    | -    | -    |      |      |      |      |      |      |      |      |      |      |      |
|    | Stool       |      | -    | -    | -    | 26.0 | 26.0 | -    | 26.0 | -    | -    | -    | -    |      |      |      |      |      |      |      |      |      |      |      |
| 12 | Respiratory |      |      |      | 29.6 | 31.9 | 30.4 | 32.4 | 33.2 | 32.1 | 34.0 | 34.1 | ND   | 33.4 | ND   | ND   | ND   | ND   |      |      |      |      |      |      |
|    | Blood       |      |      |      | -    | ND   | -    | -    | -    | -    | -    | -    | -    | -    | -    | -    | -    | -    |      |      |      |      |      |      |
|    | Urine       |      |      |      | -    | ND   | -    | -    | -    | -    | -    | -    | -    | -    | -    | -    | -    | -    |      |      |      |      |      |      |
|    | Stool       |      |      |      | -    | -    | -    | -    | -    | -    | -    | -    | -    | -    | -    | -    | -    | -    |      |      |      |      |      |      |
| 13 | Respiratory | ND   | 32.8 | -    | -    | ND   | ND   | ND   | -    | -    | -    | ND   |      |      |      |      |      |      |      |      |      |      |      |      |
|    | Blood       | -    | -    | -    | ND   | -    | ND   | -    | -    | -    | -    | -    |      |      |      |      |      |      |      |      |      |      |      |      |
|    | Urine       | -    | -    | -    | -    | -    | -    | -    | ND   | -    | -    | -    |      |      |      |      |      |      |      |      |      |      |      |      |
|    | Stool       | -    | -    | -    | -    | -    | -    | -    | -    | 36.0 | -    | -    |      |      |      |      |      |      |      |      |      |      |      |      |
| 14 | Respiratory |      | 28.2 | 22.8 | 28.1 | 22.8 | 23.9 | 25.0 | -    | 27.8 | 32.1 | 31.9 | ND   | 31.4 | 31.3 | ND   | ND   | ND   | -    | ND   |      |      |      |      |
|    | Blood       |      | -    | -    | -    | -    | -    | -    | -    | -    | -    | -    | -    | -    | -    | -    | -    | -    | -    | -    |      |      |      |      |
|    | Urine       |      | -    | -    | -    | -    | ND   | -    | -    | -    | -    | -    | -    | -    | -    | -    | -    | -    | -    | -    |      |      |      |      |
|    | Stool       |      | -    | -    | -    | -    | -    | 30.0 | 29.0 | -    | -    | -    | -    | -    | -    | -    | -    | -    | -    | -    |      |      |      |      |
| 15 | Respiratory | 35.0 | 28.2 | 34.2 | 32.6 | -    | 32.5 | -    | 31.2 | 29.9 | 31.1 | 29.0 | ND   | ND   | -    | 34.7 | ND   |      |      |      |      |      |      |      |
|    | Blood       | -    | -    | -    | -    | ND   | -    | ND   | -    | -    | -    | -    | -    | -    | -    | -    | -    |      |      |      |      |      |      |      |
|    | Urine       | -    | -    | -    | ND   | -    | -    | -    | -    | -    | -    | -    | -    | -    | -    | -    | -    |      |      |      |      |      |      |      |

|           |                    |             |             |             |             |             |             |             |             |             |             |             |             |             |             |             |             |             |   |             |   |             |   |   |
|-----------|--------------------|-------------|-------------|-------------|-------------|-------------|-------------|-------------|-------------|-------------|-------------|-------------|-------------|-------------|-------------|-------------|-------------|-------------|---|-------------|---|-------------|---|---|
|           | <b>Stool</b>       | -           | -           | -           | -           | -           | -           | -           | -           | -           | -           | -           | -           | -           | -           | -           | -           | -           | - | -           | - | -           | - | - |
| <b>16</b> | <b>Respiratory</b> |             |             |             |             |             |             | <b>36.1</b> | -           | <b>30.2</b> | <b>24.6</b> | <b>31.5</b> | <b>32.2</b> | <b>34.2</b> | <b>34.6</b> |             |             |             |   |             |   |             |   |   |
|           | <b>Blood</b>       |             |             |             |             |             |             | -           | -           | -           | -           | -           | -           | -           | -           |             |             |             |   |             |   |             |   |   |
|           | <b>Urine</b>       |             |             |             |             |             |             | -           | -           | -           | -           | -           | -           | -           | -           |             |             |             |   |             |   |             |   |   |
|           | <b>Stool</b>       |             |             |             |             |             |             | -           | -           | -           | -           | -           | -           | -           | -           |             |             |             |   |             |   |             |   |   |
| <b>17</b> | <b>Respiratory</b> | <b>33.2</b> | <b>31.3</b> | <b>32.6</b> | <b>30.9</b> | <b>33.8</b> | <b>30.5</b> | -           | <b>31.0</b> | <b>29.9</b> | ND          | ND          |             |             |             |             |             |             |   |             |   |             |   |   |
|           | <b>Blood</b>       | -           | -           | -           | ND          | -           | ND          | -           | -           | -           | -           | -           |             |             |             |             |             |             |   |             |   |             |   |   |
|           | <b>Urine</b>       | -           | -           | -           | ND          | -           | -           | -           | -           | -           | -           | -           |             |             |             |             |             |             |   |             |   |             |   |   |
|           | <b>Stool</b>       | -           | -           | -           | -           | -           | -           | -           | ND          | -           | -           | -           |             |             |             |             |             |             |   |             |   |             |   |   |
| <b>18</b> | <b>Respiratory</b> |             | <b>28.2</b> | <b>24.9</b> | <b>25.7</b> | <b>22.7</b> | <b>28.6</b> | -           | <b>30.1</b> | <b>32.9</b> | <b>31.1</b> | <b>31.6</b> | ND          | <b>30.7</b> | <b>30.9</b> | <b>32.3</b> | <b>34.1</b> | <b>37.2</b> | - | <b>34.5</b> | - | <b>35.4</b> |   |   |
|           | <b>Blood</b>       |             | -           | -           | -           | ND          | -           | ND          | -           | -           | -           | -           | -           | -           | -           | -           | -           | -           | - | -           | - | -           | - |   |
|           | <b>Urine</b>       |             | -           | -           | -           | ND          | -           | -           | -           | -           | -           | -           | -           | -           | -           | -           | -           | -           | - | -           | - | -           | - |   |
|           | <b>Stool</b>       |             | -           | -           | -           | -           | <b>30.0</b> | <b>29.0</b> | -           | -           | -           | -           | -           | -           | -           | -           | -           | -           | - | -           | - | -           | - |   |

“-“ indicates not done, “ND” indicates not detected.  
Values are indicated to one decimal place.

**eTable 3. Singapore 2019 Novel Coronavirus Outbreak Research Team Members**

| <b>Name</b>                      | <b>Highest Degree</b> | <b>Affiliation / Institution</b>                   |
|----------------------------------|-----------------------|----------------------------------------------------|
| Poh Lian Lim                     | MD                    | National Centre for Infectious Diseases, Singapore |
| Brenda Sze Peng Ang              | MPH                   | National Centre for Infectious Diseases, Singapore |
| Cheng Chuan Lee                  | MMed                  | National Centre for Infectious Diseases, Singapore |
| Li Min Ling                      | MBBS                  | National Centre for Infectious Diseases, Singapore |
| Lawrence Soon U Lee              | PhD                   | National Centre for Infectious Diseases, Singapore |
| Chen Seong Wong                  | MBBS                  | National Centre for Infectious Diseases, Singapore |
| Tau Hong Lee                     | MBBS                  | National Centre for Infectious Diseases, Singapore |
| Sapna Pradip Sadarangani         | MBBS                  | National Centre for Infectious Diseases, Singapore |
| Ray Junhao Lin                   | MMed                  | National Centre for Infectious Diseases, Singapore |
| Po Ying Chia                     | MBBS                  | National Centre for Infectious Diseases, Singapore |
| Mucheli Sharavan Sadasiv         | MMed                  | National Centre for Infectious Diseases, Singapore |
| Deborah Hee Ling Ng              | MBChB                 | National Centre for Infectious Diseases, Singapore |
| Chiaw Yee Choy                   | MBBS                  | National Centre for Infectious Diseases, Singapore |
| Tsin Wen Yeo                     | PhD                   | National Centre for Infectious Diseases, Singapore |
| Stephanie Sutjipto               | MBBS                  | National Centre for Infectious Diseases, Singapore |
| Pei Hua Lee                      | MBChB                 | National Centre for Infectious Diseases, Singapore |
| Jun Yang Tay                     | MBBS                  | National Centre for Infectious Diseases, Singapore |
| Angela Li Ping Chow              | PhD                   | National Centre for Infectious Diseases, Singapore |
| Wycliffe Wei Enli                | MBBS                  | National Centre for Infectious Diseases, Singapore |
| Ding Ying                        | PhD                   | National Centre for Infectious Diseases, Singapore |
| Bo Yan Khoo                      | MBBS                  | National Centre for Infectious Diseases, Singapore |
| Woo Chiao Tay                    | MBBS                  | National Centre for Infectious Diseases, Singapore |
| Gabrielle Ng                     | MBBS                  | National Centre for Infectious Diseases, Singapore |
| Yun Yuan Mah                     | MBBS                  | National Centre for Infectious Diseases, Singapore |
| Wilnard Tan                      | MBBS                  | National Centre for Infectious Diseases, Singapore |
| Raymond Kok Choon Fong           | MBBS                  | Changi General Hospital, Singapore                 |
| Helen May Lin Oh                 | MMed                  | Changi General Hospital, Singapore                 |
| Jaime Mei Fong Chien             | MMed                  | Changi General Hospital, Singapore                 |
| Humaira Shafi                    | MBBS                  | Changi General Hospital, Singapore                 |
| Hau Yiang Cheong                 | MBBS                  | Changi General Hospital, Singapore                 |
| Darren Cheng Han Teo             | MBBS                  | Changi General Hospital, Singapore                 |
| Thuan Tong Tan                   | PhD                   | Singapore General Hospital, Singapore              |
| Limin Wijaya                     | MBBS                  | Singapore General Hospital, Singapore              |
| Indumathi Venkatachalam          | MPH                   | Singapore General Hospital, Singapore              |
| Ying Ying Chua                   | MMed                  | Singapore General Hospital, Singapore              |
| Benjamin Pei Zhi Cherng          | MBBS                  | Singapore General Hospital, Singapore              |
| Yvonne Fu Zi Chan                | MMed                  | Singapore General Hospital, Singapore              |
| Lynette Lin Ean Oon              | MBBS                  | Singapore General Hospital, Singapore              |
| Natalie MY Lee                   | BSc                   | Singapore General Hospital, Singapore              |
| Jade Xiao Jue Soh                | MBBS                  | Sengkang General Hospital, Singapore               |
| Shuwei Zheng                     | MBBS                  | Sengkang General Hospital, Singapore               |
| Pushpalatha Bangalore Lingegowda | MBBS                  | Sengkang General Hospital, Singapore               |
| Derrick Heng                     | MPH                   | Ministry of Health, Singapore                      |
| Pream Raj                        | MPH                   | Ministry of Health, Singapore                      |
| Olivia Oh                        | PhD                   | Ministry of Health, Singapore                      |
| Constance Low                    | MPH                   | Ministry of Health, Singapore                      |
| Kelly Foo                        | MPH                   | Ministry of Health, Singapore                      |
| Khine Nandar                     | MPH                   | Ministry of Health, Singapore                      |
| Yijun Lin                        | MPH                   | Ministry of Health, Singapore                      |
| Rachael Pung                     | Msc                   | Ministry of Health, Singapore                      |
| Guanhao Chan                     | Bsc                   | Ministry of Health, Singapore                      |
| Xinyi Peh                        | Bsc                   | Ministry of Health, Singapore                      |
| Charlene Ting Ting Tow           | MSc                   | Ministry of Health, Singapore                      |

## eReferences

1. Laboratory guidance. <https://www.who.int/emergencies/diseases/novel-coronavirus-2019/technical-guidance/laboratory-guidance>. Accessed February 26, 2020.
2. Zhu N, Zhang D, Wang W, et al. A Novel Coronavirus from Patients with Pneumonia in China, 2019. *N Engl J Med*. 2020;382(8):727-733. doi:10.1056/NEJMoa2001017
